# Supplementary material for: Identification of inflammasome signaling proteins in neurons and microglia in early and intermediate stages of Alzheimer's disease
Source: PubMed Central journal article supplement (PMC10307529; doi:10.1111/bpa.13142), 2022-12-29
Supplement: BPA-33-e13142-s001.pdf [file BPA-33-e13142-s001.pdf]

## Supplementary Data 2

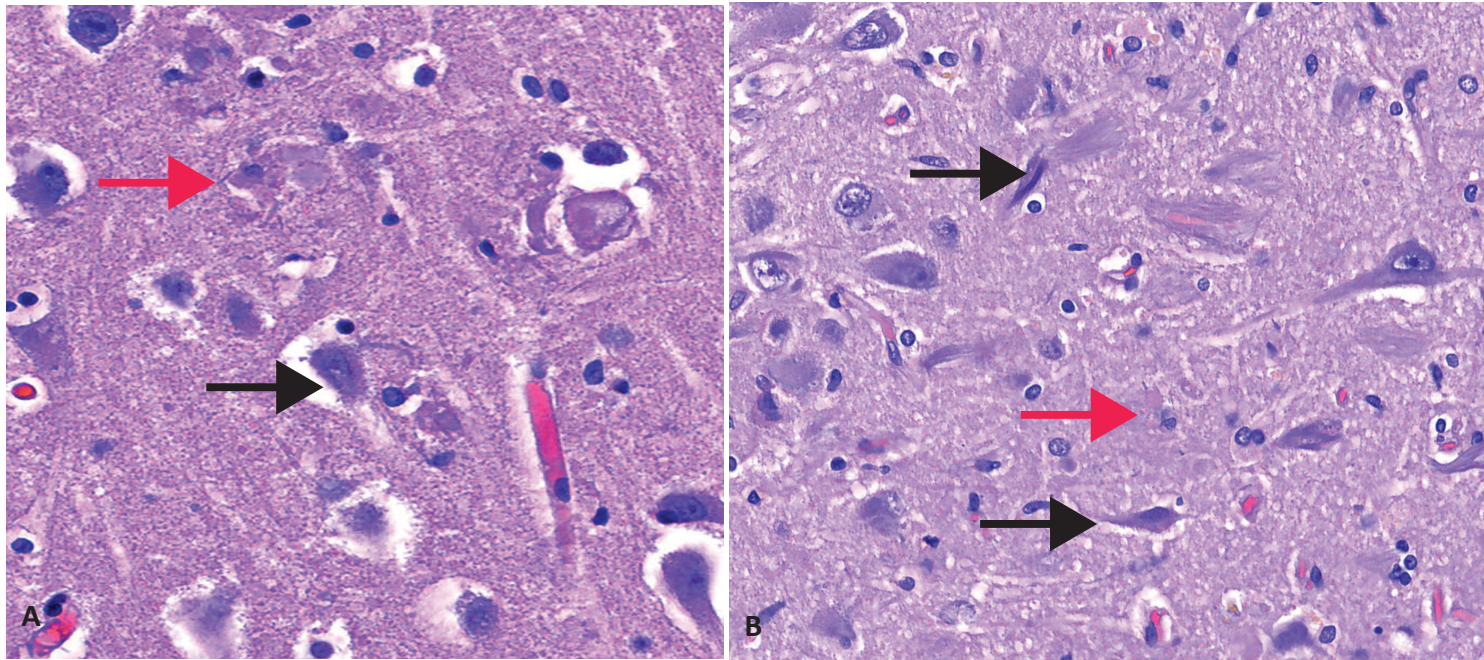

Supplementary Data Figure 2. Alzheimer pathology seen in Hematoxylin and Eosin staining in two donors with intermediate Alzheimer's disease neuropathological changes. In the Intermediate AD donor #16, the red arrows are pointing to amyloid plaque formation and the black arrow is pointing to a neurofibrillary tangle seen in the CA 2 region of the hippocampus (image A). The CA1 hippocampal region is shown in image B from intermediate AD donor #3. The black arrows are pointing to neurofibrillary tangles and the red arrow is pointing to a small plaque formation.
